# Supplementary material for: Massive and prolonged deep carbon emissions associated with continental rifting
Source: Springer Nature journal article supplement (doi:10.1038/ngeo2622), 2016-01-18
Supplement: 41561_2016_BFngeo2622_MOESM238_ESM.pdf [file 41561_2016_BFngeo2622_MOESM238_ESM.pdf]

# Massive and prolonged deep carbon emissions associated with continental rifting

Hyunwoo Lee, James D. Muirhead, Tobias P. Fischer, Cynthia J. Ebinger, Simon A. Kattenhorn, Zachary D. Sharp and Gladys Kianji

## 3 Definition of tectonic degassing

4 The term tectonic degassing was coined by ref. 1, and can be used to differentiate mantle-derived  
5 CO<sub>2</sub> degassing at active volcanic centers (e.g., composite volcanoes, caldera complexes) from  
6 areas that are not directly affected by volcanism at the surface. CO<sub>2</sub> released from tectonic  
7 degassing is sourced from the mantle (e.g., Apennines, Italy; ref. 2) and ascends the crust through  
8 fault networks before reaching the surface in areas away from any observable volcanoes. Therefore,  
9 three specific criteria must be met under a tectonic degassing model: (1) the CO<sub>2</sub> must have a  
10 magmatic (mantle-derived) signature; (2) the CO<sub>2</sub> must ascend through the crust along faults and  
11 fractures; and (3) the CO<sub>2</sub> must reach the surface away from volcanic centers (e.g., composite  
12 volcanoes).

## 13 Definition of structural zones from field-based analyses and aerial mapping

14 We observed the highest CO<sub>2</sub> flux in the vicinity of faults, in a zone extending outward from the  
15 base of the fault scarp over a distance equal to the fault throw (*fault zone* in Figs. S3, S4, and Fig.  
16 3 of the main text). Permeable sediments in faulted grabens also exhibited higher flux values than  
17 those observed in impermeable lavas in uplifted footwalls. Based on these observations, we  
18 subdivided all CO<sub>2</sub> flux measurements into three categories based on sample location relative to  
19 fault structure and surface geology. These structural categories include: (1) *fault zones*, defined as  
20 the area directly adjacent to the fault scarp and extending outward on the downthrown side of the  
21 fault to a distance equal to the maximum throw; (2) *hanging walls*, the downthrown side of the  
22 fault excluding the fault zone and characterized by sedimentary fill; and (3) *footwalls*, the uplifted

23 side of the fault comprising primarily rift lavas with a thin veneer of sediments in places (Fig. S4).

#### 24 **Structural controls on CO<sub>2</sub> degassing**

25 Categorizing flux measurements into the three zones outlined above revealed distinct  
26 distributions in diffuse CO<sub>2</sub> flux data (Fig. S4, Table S2, and Fig. 3 of the main text). Measurements  
27 in fault zones exhibited 2 to 17 times greater mean CO<sub>2</sub> flux than background values recorded in  
28 the hanging walls and footwalls of faults (Table S2). Furthermore, mean flux values in the  
29 permeable sediment fill in downthrown hanging walls were 5 to 11 times greater than mean flux  
30 in impermeable rift lavas in uplifted footwalls. Consistent with previous studies of diffuse CO<sub>2</sub>  
31 flux in tectonically active regions<sup>3</sup>, these results imply a structural control on the flux of CO<sub>2</sub>  
32 through the Magadi-Natron basin. High CO<sub>2</sub> flux occurred near the base of fault scarps, suggesting  
33 focused flow of CO<sub>2</sub>-rich fluids through fault structures with high crustal permeability<sup>1</sup>, which is  
34 further supported by observations of aligned spring systems at the base of some fault scarps (Table  
35 S4, and Fig. 3 of the main text). Faults in the Magadi-Natron basin form as dilational normal  
36 faults<sup>4,5</sup>, which produce fault-related apertures in the near the surface (<500 m depth: ref. 6) that  
37 likely facilitate diffuse CO<sub>2</sub> transport into overlying sediments. In the shallow subsurface, CO<sub>2</sub>  
38 spreads diffusely throughout these permeable sediments in the hanging wall of the fault (for  
39 example, ref. 3), with negligible flux occurring through impermeable rift lavas in the uplifted  
40 footwall (Fig. S4, Table S2, and Fig. 3 of the main text).

#### 41 **Estimating CO<sub>2</sub> flux in the Magadi-Natron basin and Eastern rift of the EAR**

42 Although CO<sub>2</sub> gas emits diffusely over the 982 km<sup>2</sup> study area in the Magadi-Natron basin, there  
43 are clear differences in flux within the three structural zones defined above (Fig. S4 and Table S2).  
44 To account for these observed variations, we calculate total flux within each of our defined zones

45 by multiplying the area of each zone (Fig. S3 and Table S3) by its mean CO<sub>2</sub> flux (Table S2). These  
46 values are then summed to calculate total diffuse CO<sub>2</sub> flux in the study area (Table S3). The areas  
47 occupied by downthrown graben sediments and uplifted trachyte lavas on the hanging walls and  
48 footwalls of faults, as well as fault traces (Fig. S3), were mapped from aerial photography (0.5 m  
49 resolution), Landsat 7 false color imagery (15 m resolution) and the Aster GDEM v.2 (30 m  
50 resolution), and validated in the field. Applying the method of ref. 7, fault throw (T) was estimated  
51 from the throw-length scaling relationship within the Magadi-Natron fault population using  $T =$   
52  $\gamma L$  (Eq. 1), where L is fault length and  $\gamma$  is the throw/length coefficient. Our study used a  $\gamma$  of  
53 0.0061 for faults of the Magadi-Natron basin, which was estimated from 30 faults measured from  
54 the Aster GDEM v.2 and aerial photography (0.5 m resolution). This value of  $\gamma$  is similar to dilation  
55 normal fault systems forming in rift lavas in Iceland (0.006; ref. 5). The area of the fault zone for  
56 each fault was then calculated by multiplying the fault length by fault throw calculated using  
57 equation 1.

58 Uncertainties in our flux estimates are reported as the standard error of the sample distributions  
59 (Tables S2, S3). Previous field studies of diffuse CO<sub>2</sub> degassing used a densely-sampled grid over  
60 comparatively smaller areas, collecting ~10-100 samples per km<sup>2</sup> (ref. 8, 9) compared to ~1 per  
61 km<sup>2</sup> collected for this work. However, our study area is 1 to 2 orders of magnitude larger than  
62 those of previous studies and was, therefore, comparatively sparsely sampled (565 measurements  
63 over 982 km<sup>2</sup>). The diffuse CO<sub>2</sub> flux is also clearly influenced by fault structure and permeability  
64 of the substrate (Fig. S4). These two factors limit the application of existing methods of  
65 geostatistical analysis (for example SGeMS) used to quantify total CO<sub>2</sub> flux<sup>8-10</sup>. For these reasons,  
66 we suggest that the “structural-area method” outlined in the section above (Table S3) currently  
67 provides the most robust estimate of total CO<sub>2</sub> flux for the study site. It is, however, challenging

68 to estimate the extent to which our collected flux data represents a fair distribution of CO<sub>2</sub> flux in  
69 the defined structural zones. We have therefore used a conservative estimate of total flux across  
70 the entire Magadi-Natron basin. Essentially, we calculated a CO<sub>2</sub> flux of 4.05 Mt yr<sup>-1</sup> over only  
71 ~10% of the 9,200 km<sup>2</sup> Magadi-Natron basin (combined study area = 982 km<sup>2</sup>; Fig. S3 and Table  
72 S3), but conservatively assumed that this amount represents the total flux across the entire Magadi-  
73 Natron basin. In this study, the basin length is defined as the distance from Oldoinyo Lengai to  
74 Suswa volcano (184 km long), and basin width is defined as the distance from the western border  
75 fault system to the eastern edge of the faulted monoclinial flexure in the hanging wall of the half-  
76 graben structure (50 km wide; ref. 11). Assuming a total CO<sub>2</sub> flux of 4.05 Mt yr<sup>-1</sup> for the 9,200  
77 km<sup>2</sup> Magadi-Natron basin equates to a minimum value of flux per unit area of  $4.4 \times 10^2$  t km<sup>-2</sup> yr<sup>-1</sup>.  
78 <sup>1</sup>. This conservative value is one to two orders of magnitude lower than typical flux per unit area  
79 estimates of tectonic degassing in smaller (~10<sup>1</sup> km<sup>2</sup>), geothermal regions elsewhere<sup>12</sup>, yet the total  
80 flux is significant compared to flux values from historically active volcanoes (Fig. S5).

81 The minimum CO<sub>2</sub> flux calculated for the Magadi-Natron basin may be used to extrapolate an  
82 estimate of CO<sub>2</sub> flux for the entire Eastern rift of the EAR. We applied rift dimensions in  
83 accordance with ref. 13, and define the Eastern rift to include rift basins from the Afar depression  
84 southward to the Kilombero rift over a total area of 3,240 × 50 km. By extrapolating CO<sub>2</sub> flux per  
85 unit area from the Magadi-Natron basin ( $4.4 \times 10^2$  t km<sup>-2</sup> yr<sup>-1</sup>) across the Eastern rift, we make a  
86 number of assumptions about the nature of magmatism, faulting, and fluid migration in this rift  
87 sector. First, we assume that strain accommodation proceeds in a similar manner across the Eastern  
88 rift via dike intrusion and faulting. Second, plate spreading is accommodated across the full width  
89 of rift basins, as suggested by the distribution of seismicity observed across the Eastern rift<sup>14-19</sup>  
90 (Fig. 1 of the main text). Third, we assume that the faulted basins are underlain by zones of magma

91 intrusion, as detected in geophysical imaging, and detection of active intrusions<sup>14,15,19-23</sup>. Fourth,  
92 we assume that fluids exsolved from these crustal and upper mantle magma bodies migrate through  
93 permeable fault zones, which is supported by fluid-driven lower crustal and upper mantle  
94 earthquakes observed in the Albertine rift basin<sup>24</sup> and in magmatic rifts elsewhere (e.g., Taupo Rift,  
95 New Zealand; ref. 25).

## 96 **Sources of CO<sub>2</sub> in the Magadi-Natron basin**

97 CO<sub>2</sub> is removed from the mantle by the generation and ascent of magma. It exsolves from  
98 magma during cooling, crystallization and decompression, before rising through lithosphere along  
99 fractured, permeable pathways<sup>1, 26</sup>. Seismic and magnetotelluric studies along the Eastern rift  
100 provide evidence for volumetrically significant accumulations of magma at depth<sup>14-15, 20-23, 27-29</sup>.  
101 This magma is the likeliest source of the mantle-derived CO<sub>2</sub> measured at the surface. Here we  
102 discuss the possible location of the source (upper crust, lower crust, or upper mantle) in the  
103 Magadi-Natron basin based on previous work and the lower crustal seismicity presented in this  
104 study.

105 *Upper crust.* Although two shallow dike intrusions (< 10 km deep) have been detected by InSAR  
106 and temporary seismic arrays in the Magadi-Natron basin in the last 20 years<sup>14, 17, 30</sup>, the volume  
107 of these intrusions is too small to supply the estimated 4.05 Mt yr<sup>-1</sup> of CO<sub>2</sub>. For example, assuming  
108 that the 2.4 m-wide, 7 km-long and 4 km-high 2007 Natron dike<sup>21, 30</sup> consisted of 1 wt% CO<sub>2</sub> and  
109 had a density of 3000 kg m<sup>-3</sup>, it would have sourced only 2 Mt of CO<sub>2</sub> to the Magadi-Natron basin  
110 7 years prior to the current survey. Based on analogy to other rift sectors (e.g., Main Ethiopian Rift;  
111 ref. 15, 23), the primary CO<sub>2</sub> is thus likely sourced from lower crustal and mantle lithosphere  
112 magma bodies.

113 *Lower crust and Upper mantle.* Anomalously low uppermost mantle (Pn) velocities across the  
114 Magadi sector of the Kenya Rift can be explained by a zone of ~5% partial melt<sup>20, 22</sup>. CO<sub>2</sub> may  
115 exsolve from magmas in the partial melt zone, and then travel vertically through faults in a strong,  
116 mafic lower crust, resulting in the observed deep seismicity (e.g., ref. 24, 31). Alternatively, lower  
117 crustal seismicity could also be caused by active magma intrusion<sup>15</sup> and volatile-driven hydraulic  
118 fracturing along the margins of modern dike and sill intrusions<sup>32</sup>, or in some places represent  
119 detachment faulting<sup>33</sup>.

121

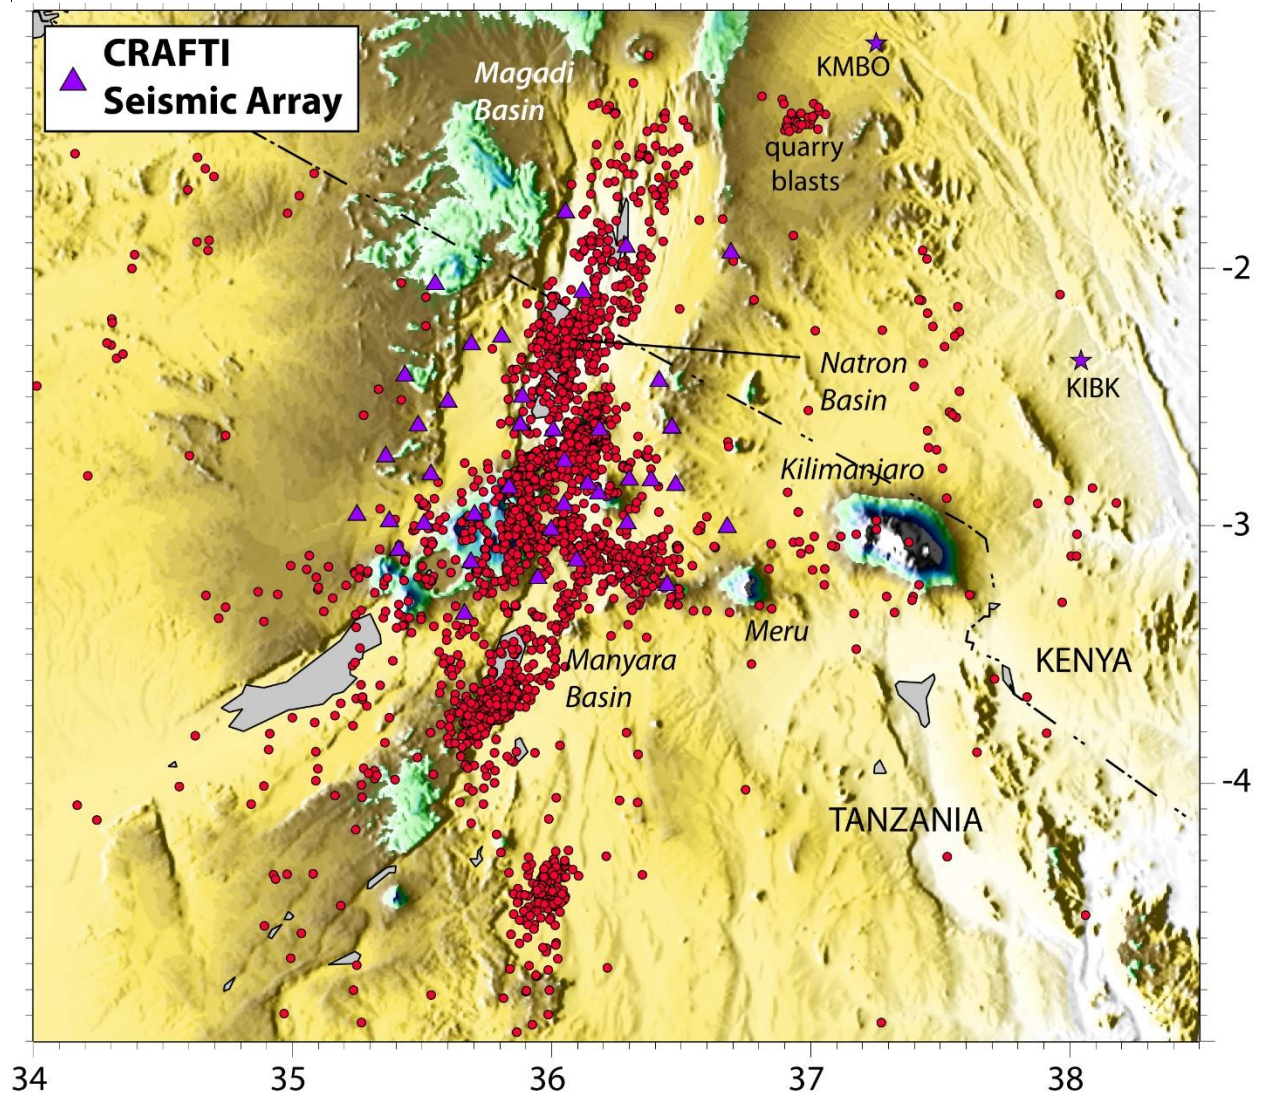

122

123 **Figure S1 | CRAFTI seismic network (purple triangles) and GEOFON stations KIBK and**

124 **KMBO also used in event locations (red circles).**

125

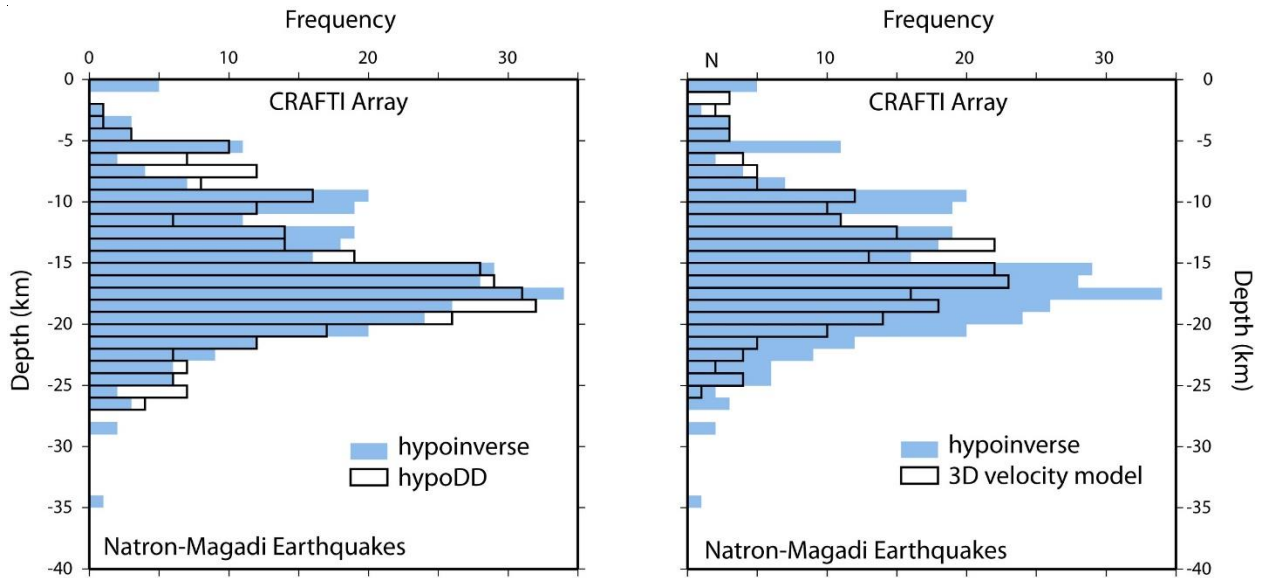

126

127 **Figure S2 | Histograms comparing depths of CRAFTI earthquakes in the Natron and Magadi**

128 **basins (excluding Gelai earthquakes).** Earthquakes located using hypoinverse are compared to

129 those relocated using the double-difference algorithm (left) and a sub-set relocated in the 3D

130 tomographic inversion (right). The pattern of depth distributions show little variation between

131 methods, demonstrating a significant set of earthquakes in the lower crust (15-27 km) along the

132 length of the Natron and Magadi basins.



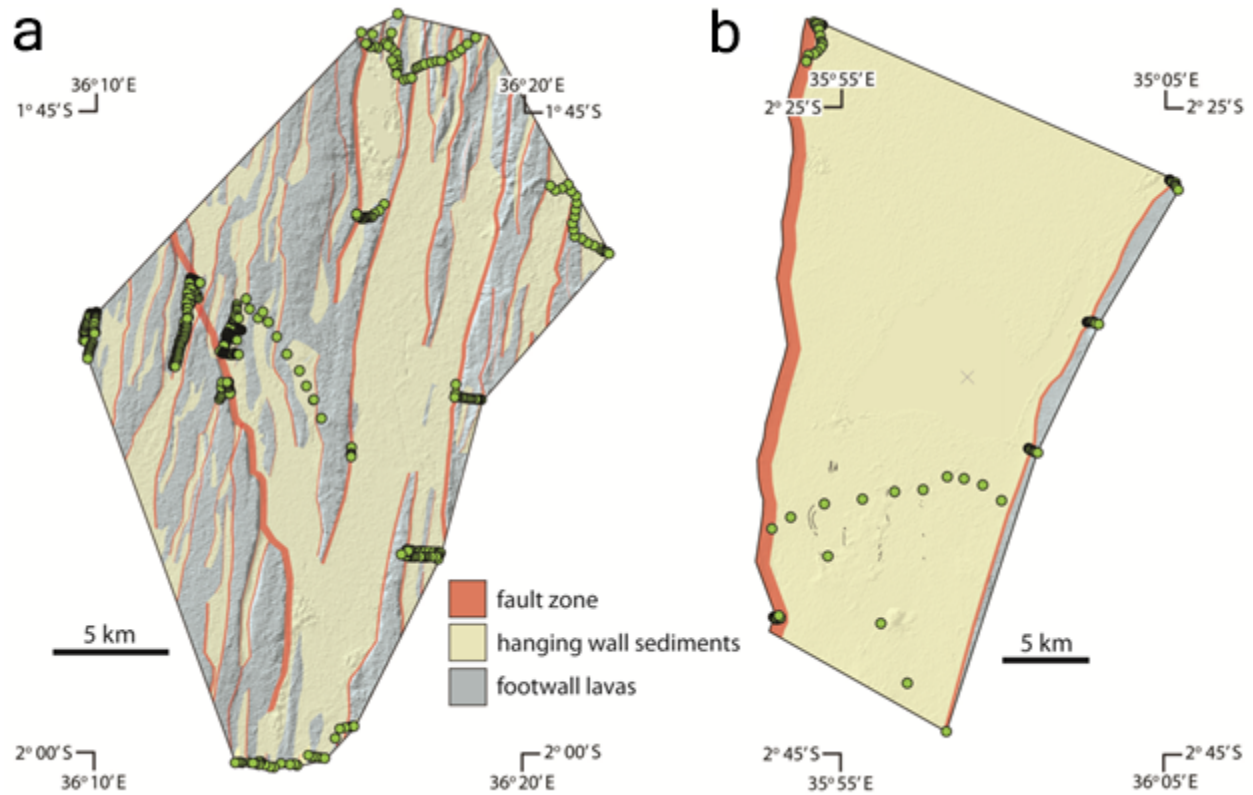

133

134 **Figure S3 | Areal distributions of fault zones, hanging wall sediments, and footwall lavas in**  
 135 **the Magadi (a) and Natron (b) basin study areas.** Structural zones are overlain on an Aster  
 136 GDEM v.2 hillshade. Locations of CO<sub>2</sub> flux measurements are presented as green circles. Small  
 137 faults (10s to 100s of meters long) and short gaping fissures (10s of meters long) mapped in the  
 138 field by ref. 34 are presented as black lines.

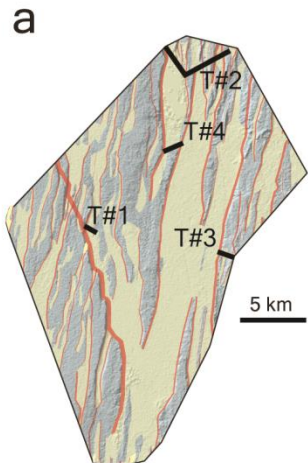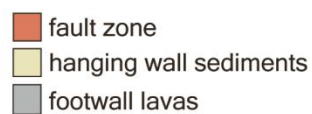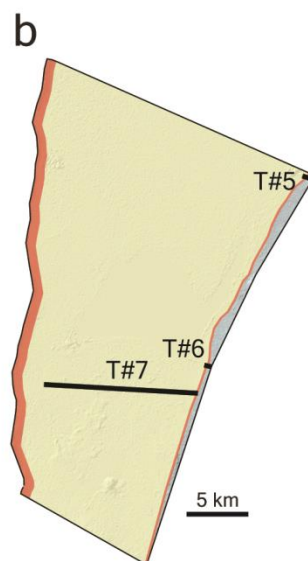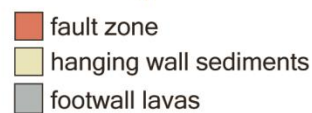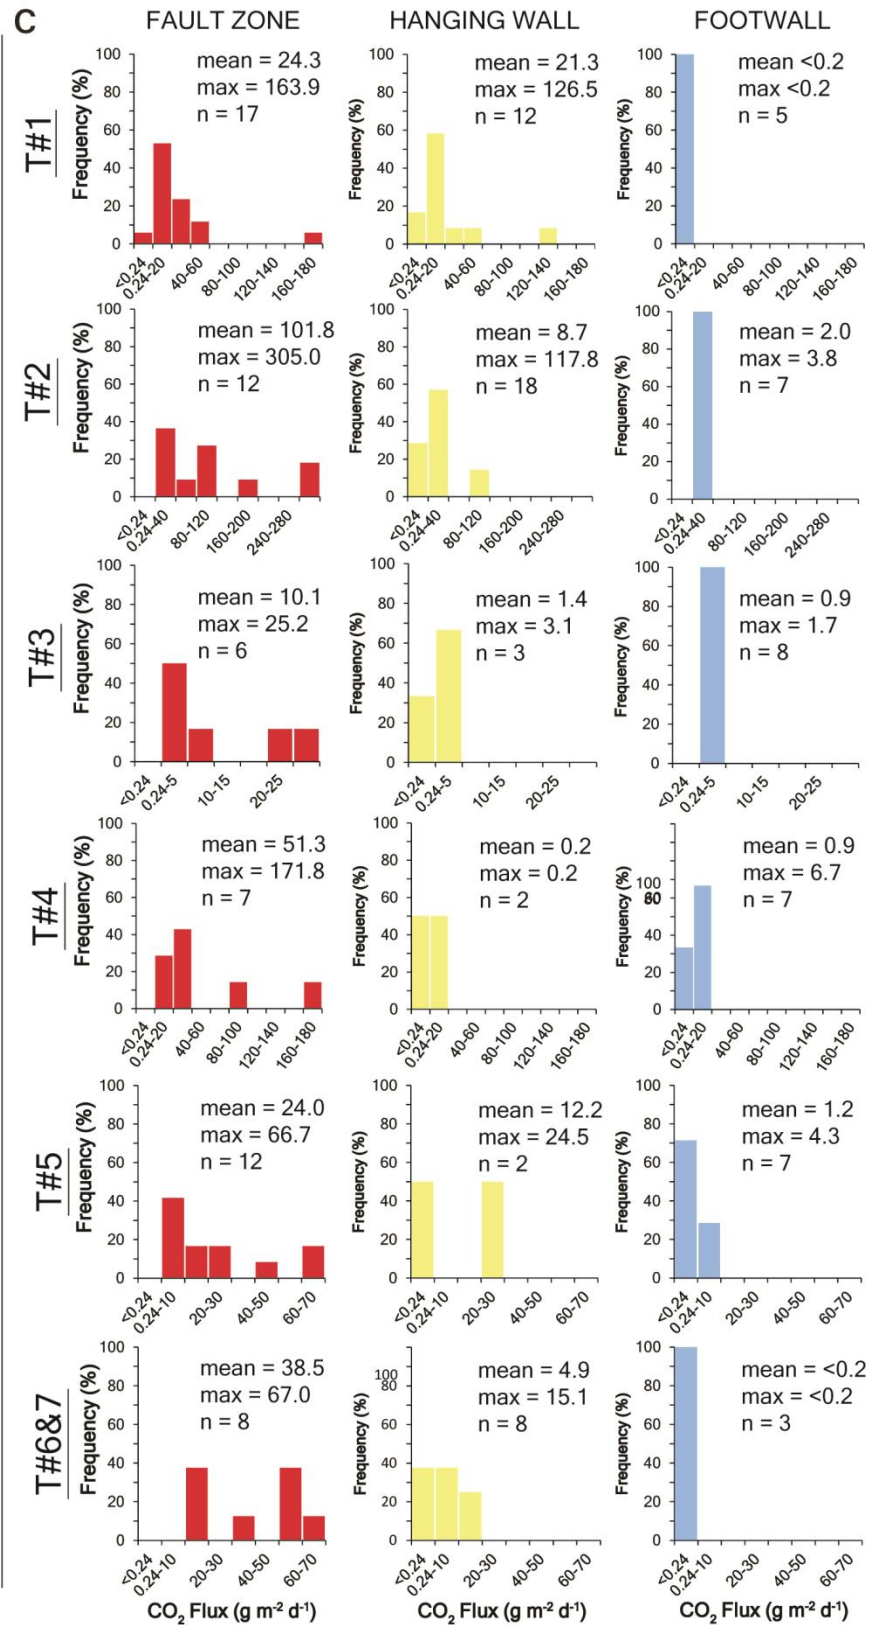

140 **Figure S4 | Diffuse CO<sub>2</sub> flux data from 7 transects across the Natron-Magadi basin. a,b,**  
141 general location of each transect in the Magadi (a) and Natron (b) study areas. Transect numbers  
142 (e.g., T#1, T#2) correspond to transect numbers of histograms in (c). Coordinates of study areas  
143 and sample locations are shown in Fig. S1. **c,** Histograms of diffuse CO<sub>2</sub> flux in fault zones (red),  
144 hanging walls (yellow), and footwalls (blue) from the transects shown in (a) and (b). Units for  
145 mean and max values are g m<sup>-2</sup> d<sup>-1</sup>.

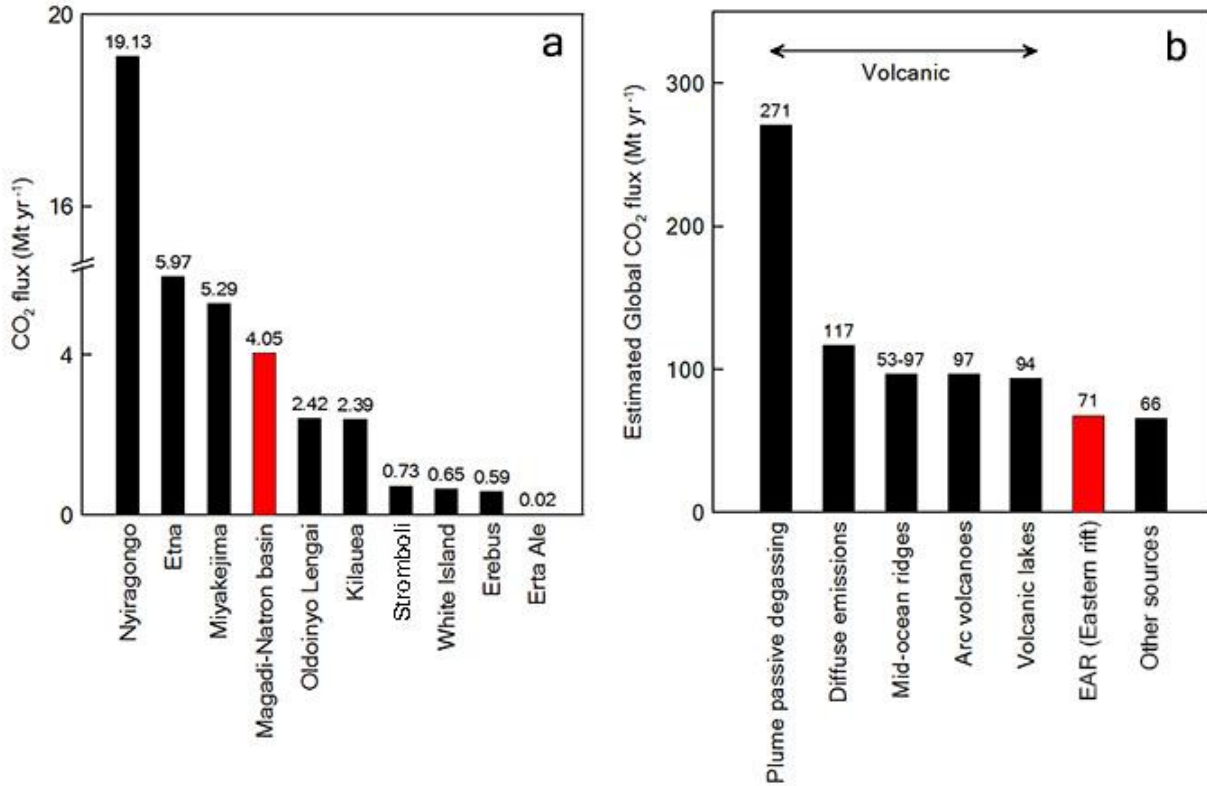

146

147 **Figure S5 | Histograms of CO<sub>2</sub> flux. a.** Annual CO<sub>2</sub> flux from tectonic degassing in the Magadi-  
 148 Natron basin and a selection of volcanoes worldwide<sup>1</sup>. **b.** CO<sub>2</sub> flux from tectonic degassing in the  
 149 EAR (Eastern rift) compared with global estimates from volcanoes and other sources (tectonic,  
 150 hydrothermal, or inactive volcanic)<sup>1, 35-37</sup>.

151 **Table S1. Locations, gas compositions, C isotope values, and structural divisions of measured**  
 152 **samples from the Magadi and Natron basin study areas and Oldoinyo Lengai North Crater.**

| Area   | sample ID | location      |                | Ar    | N <sub>2</sub> | O <sub>2</sub> | CO <sub>2</sub> | He    | H <sub>2</sub> | CH <sub>4</sub> | CO    | $\delta^{13}\text{C-CO}_2$<br>‰ vs. PDB | structural<br>division |
|--------|-----------|---------------|----------------|-------|----------------|----------------|-----------------|-------|----------------|-----------------|-------|-----------------------------------------|------------------------|
|        |           | latitude (S°) | Longitude (E°) |       |                |                |                 |       |                |                 |       |                                         |                        |
| Magadi | A1P44     | 1.828625      | 36.167317      | 0.70  | 83.19          | 16.02          | 944.42          | 6.84  | 8.26           | b.d.            | b.d.  | -8.5                                    | FZ                     |
|        | A1P63     | 1.84275       | 36.165028      | 0.70  | 83.28          | 15.94          | 832.00          | 7.11  | 5.45           | b.d.            | b.d.  | -9.2                                    | FZ                     |
|        | A1P43     | 1.828289      | 36.167503      | 0.85  | 82.27          | 16.79          | 824.71          | 2.21  | 6.14           | b.d.            | 16.03 | -7.7                                    | FZ                     |
|        | A1P39     | 1.829833      | 36.165639      | 0.71  | 83.64          | 15.56          | 863.52          | 7.23  | 5.47           | b.d.            | b.d.  | -9.6                                    | HW                     |
|        | A1P67     | 1.845944      | 36.164417      | 0.67  | 78.47          | 20.78          | 800.38          | 7.44  | 5.63           | b.d.            | b.d.  | -8.7                                    | FZ                     |
|        | A2P82     | 1.838444      | 36.200167      | 0.66  | 80.61          | 18.66          | 642.53          | 6.49  | 5.35           | b.d.            | b.d.  | -8.1                                    | FZ                     |
|        | A2P76     | 1.843972      | 36.198778      | 0.69  | 81.51          | 17.74          | 645.68          | 6.82  | 9.16           | b.d.            | 16.32 | -8.0                                    | FZ                     |
|        | A2P69     | 1.848028      | 36.1975        | 0.68  | 80.45          | 18.78          | 869.88          | 6.60  | 6.07           | b.d.            | b.d.  | -10.1                                   | FZ                     |
|        | A2P86     | 1.834333      | 36.201639      | 0.66  | 80.85          | 18.42          | 688.76          | 7.29  | 5.62           | b.d.            | b.d.  | -7.8                                    | FW                     |
|        | A3P5      | 1.859028      | 36.216361      | 0.76  | 78.94          | 20.22          | 803.95          | 0.96  | 5.86           | b.d.            | b.d.  | -8.4                                    | FZ                     |
|        | A3P13     | 1.8575        | 36.218989      | 0.70  | 82.03          | 17.15          | 1223.27         | 9.21  | 4.26           | b.d.            | b.d.  | -9.1                                    | FZ                     |
|        | A3P9      | 1.856528      | 36.216472      | 0.81  | 76.97          | 22.15          | 698.69          | 1.49  | 5.40           | b.d.            | b.d.  | -9.9                                    | HW                     |
|        | A3P18     | 1.859328      | 36.219308      | 0.59  | 79.38          | 19.84          | 1882.03         | 13.47 | 4.37           | b.d.            | b.d.  | -7.6                                    | FZ                     |
|        | A3P8      | 1.856833      | 36.216667      | 0.70  | 81.43          | 17.81          | 544.99          | 10.88 | 8.60           | b.d.            | b.d.  | -7.2                                    | FZ                     |
|        | A3P21     | 1.85575       | 36.218472      | 0.70  | 83.55          | 15.36          | 3803.59         | 7.51  | 6.70           | b.d.            | b.d.  | -7.9                                    | FZ                     |
|        | A4P27     | 1.835535      | 36.21852       | 0.86  | 82.60          | 16.46          | 768.65          | 1.47  | 4.57           | b.d.            | b.d.  | -8.5                                    | FZ                     |
|        | A4P94     | 1.834439      | 36.222847      | 0.66  | 80.38          | 18.86          | 994.93          | 5.74  | 8.15           | b.d.            | 15.77 | -7.5                                    | HW                     |
|        | A4P82     | 1.844181      | 36.219661      | 0.86  | 82.32          | 16.70          | 1201.33         | 1.41  | 13.01          | b.d.            | b.d.  | -7.1                                    | HW                     |
|        | A4P101    | 1.834103      | 36.220825      | 0.68  | 80.96          | 18.23          | 1314.96         | 6.61  | 6.58           | b.d.            | b.d.  | -7.3                                    | HW                     |
|        | A4P111    | 1.836356      | 36.219469      | 0.82  | 81.82          | 17.31          | 578.11          | 7.43  | 6.45           | b.d.            | b.d.  | -7.3                                    | HW                     |
|        | A4P113    | 1.8369        | 36.220089      | 0.71  | 80.05          | 19.14          | 990.99          | 7.67  | 6.11           | b.d.            | b.d.  | -7.1                                    | HW                     |
|        | A4P81     | 1.844089      | 36.219269      | 0.65  | 81.23          | 17.99          | 1223.57         | 6.45  | 12.23          | b.d.            | 18.19 | -6.5                                    | HW                     |
|        | A4P90     | 1.844239      | 36.222794      | 0.68  | 82.28          | 16.95          | 919.84          | 5.70  | 8.27           | b.d.            | b.d.  | -7.5                                    | FZ                     |
|        | A4P99     | 1.834244      | 36.221225      | 0.81  | 80.60          | 18.49          | 1025.56         | 2.30  | 5.75           | b.d.            | b.d.  | -7.4                                    | HW                     |
|        | A4P108    | 1.835656      | 36.218458      | 0.82  | 80.51          | 18.62          | 464.87          | 10.02 | 4.94           | b.d.            | b.d.  | -7.9                                    | FZ                     |
|        | A4P115    | 1.837517      | 36.220681      | 0.70  | 81.67          | 17.53          | 988.54          | 7.20  | 6.40           | b.d.            | b.d.  | -5.9                                    | HW                     |
|        | A4P120    | 1.838653      | 36.221867      | 0.69  | 82.52          | 16.68          | 1053.10         | 11.22 | 4.88           | b.d.            | b.d.  | -7.5                                    | FZ                     |
|        | A5P19     | 1.815472      | 36.205722      | 0.79  | 79.51          | 19.65          | 520.77          | 8.36  | 6.44           | b.d.            | b.d.  | -8.3                                    | HW                     |
|        | A5P24     | 1.816417      | 36.207694      | 0.68  | 82.31          | 16.91          | 958.17          | 10.92 | 3.74           | b.d.            | b.d.  | -7.8                                    | FZ                     |
|        | A5P34     | 1.824361      | 36.203278      | 0.69  | 80.32          | 18.91          | 835.54          | 9.20  | 9.12           | b.d.            | 11.93 | -8.6                                    | HW                     |
| A5P21  | 1.815889  | 36.2065       | 0.79           | 82.61 | 16.53          | 663.78         | 8.99            | 4.47  | b.d.           | b.d.            | -7.4  | HW                                      |                        |

|        |          |           |      |       |       |         |       |       |      |       |       |    |
|--------|----------|-----------|------|-------|-------|---------|-------|-------|------|-------|-------|----|
| A6P54  | 1.830889 | 36.22075  | 0.61 | 79.55 | 19.77 | 710.90  | 13.86 | 4.32  | b.d. | b.d.  | -8.0  | FZ |
| A6P50  | 1.829417 | 36.221194 | 0.67 | 80.95 | 18.29 | 873.04  | 6.04  | 5.84  | b.d. | 13.99 | -11.1 | FZ |
| A6P52  | 1.831139 | 36.220667 | 0.69 | 82.27 | 16.89 | 1360.76 | 7.29  | 10.39 | b.d. | b.d.  | -6.5  | FZ |
| A7P30  | 1.921111 | 36.288222 | 0.74 | 82.89 | 16.29 | 784.68  | 11.22 | 9.06  | b.d. | 10.48 | -5.8  | HW |
| A7P26  | 1.922417 | 36.288417 | 0.80 | 80.20 | 18.94 | 617.14  | 13.02 | 4.59  | b.d. | b.d.  | -10.2 | HW |
| A7P14  | 1.922694 | 36.3      | 1.08 | 80.64 | 18.22 | 573.68  | 8.71  | 5.69  | b.d. | b.d.  | -7.4  | FZ |
| A7P4   | 1.920306 | 36.289306 | 0.71 | 80.22 | 18.99 | 759.74  | 9.05  | 9.89  | b.d. | b.d.  | -6.4  | HW |
| A7P22  | 1.922611 | 36.292944 | 0.70 | 80.63 | 18.58 | 915.98  | 6.14  | 7.09  | b.d. | 15.99 | -7.7  | FW |
| A7P12  | 1.921056 | 36.300694 | 0.68 | 80.72 | 18.51 | 881.32  | 6.31  | 17.93 | b.d. | 16.64 | -8.9  | FZ |
| A7P5   | 1.920361 | 36.292444 | 0.83 | 82.34 | 16.78 | 484.60  | 7.68  | 7.52  | b.d. | 13.83 | -7.1  | HW |
| A7P19  | 1.922639 | 36.294639 | 0.71 | 82.14 | 17.07 | 834.17  | 7.29  | 6.63  | b.d. | 16.45 | -6.7  | FZ |
| A7P11  | 1.920778 | 36.300111 | 0.67 | 81.11 | 18.13 | 818.68  | 6.94  | 6.21  | b.d. | b.d.  | -6.9  | HW |
| A7P8   | 1.920528 | 36.294722 | 0.69 | 82.46 | 16.79 | 543.74  | 7.94  | 5.11  | b.d. | b.d.  | -8.1  | FZ |
| A7P29  | 1.922139 | 36.28775  | 0.86 | 82.56 | 16.51 | 659.63  | 9.54  | 4.19  | b.d. | b.d.  | -7.6  | FZ |
| A8P35  | 1.988944 | 36.264167 | 0.69 | 82.05 | 17.19 | 686.65  | 10.77 | 4.64  | b.d. | b.d.  | -6.2  | FZ |
| A8P40  | 2.000389 | 36.25275  | 0.72 | 81.21 | 17.97 | 969.67  | 8.67  | 12.59 | b.d. | b.d.  | -7    | HW |
| A8P50  | 2.00225  | 36.231458 | 0.68 | 82.23 | 16.98 | 1021.22 | 7.66  | 11.89 | b.d. | b.d.  | -7.3  | FZ |
| A8P42  | 1.999722 | 36.249889 | 0.67 | 82.17 | 17.09 | 662.11  | 6.05  | 7.51  | b.d. | b.d.  | -8.5  | HW |
| A9P9   | 1.730319 | 36.298964 | 0.70 | 82.11 | 17.11 | 842.79  | 6.70  | 6.90  | b.d. | 17.19 | -9.3  | FZ |
| A9P5   | 1.732603 | 36.291972 | 0.86 | 81.06 | 18.03 | 497.51  | 2.31  | 8.45  | b.d. | b.d.  | -9.6  | HW |
| A9P4   | 1.733103 | 36.291111 | 0.67 | 81.21 | 18.05 | 676.82  | 5.91  | 6.32  | b.d. | 15.89 | -8.6  | HW |
| A11P36 | 1.789639 | 36.268178 | 0.94 | 82.83 | 16.05 | 1735.20 | 2.00  | 9.37  | b.d. | 19.63 | -5.7  | FZ |
| A11P29 | 1.791111 | 36.271242 | 0.66 | 82.73 | 16.53 | 776.27  | 12.62 | 6.91  | b.d. | b.d.  | -4.3  | FZ |
| A11P32 | 1.790764 | 36.269622 | 0.69 | 82.19 | 17.01 | 1107.14 | 9.93  | 5.06  | b.d. | 14.95 | -3.8  | FZ |
| A11P22 | 1.785847 | 36.278933 | 0.69 | 81.18 | 18.05 | 779.67  | 8.95  | 5.99  | b.d. | 15.39 | -9.1  | FW |
| A12P7  | 1.801833 | 36.359917 | 0.85 | 83.54 | 15.56 | 527.89  | 2.15  | 7.77  | b.d. | b.d.  | -9.3  | HW |
| A12P4  | 1.804222 | 36.364472 | 0.84 | 80.77 | 18.32 | 618.92  | 1.47  | 9.79  | b.d. | 18.57 | -6.8  | HW |
| A12P17 | 1.780528 | 36.351111 | 0.85 | 80.56 | 18.52 | 666.84  | 1.66  | 5.89  | b.d. | b.d.  | -9.3  | HW |
| A12P9  | 1.799083 | 36.355278 | 0.70 | 82.78 | 16.43 | 822.19  | 7.42  | 6.65  | b.d. | 15.84 | -8.5  | HW |
| A12P19 | 1.779556 | 36.347639 | 0.78 | 80.08 | 19.05 | 893.78  | 0.84  | 5.58  | b.d. | 16.00 | -6.9  | HW |
| A12P1  | 1.802944 | 36.362472 | 0.71 | 82.26 | 16.98 | 487.25  | 7.25  | 7.51  | b.d. | b.d.  | -9.8  | HW |
| A13P38 | 1.855694 | 36.30675  | 0.87 | 82.01 | 17.01 | 1106.85 | 2.09  | 10.20 | b.d. | b.d.  | -7.4  | FZ |
| A13P37 | 1.860667 | 36.306194 | 0.85 | 82.04 | 17.00 | 981.63  | 9.35  | 10.16 | b.d. | b.d.  | -9.3  | FZ |
| A13P31 | 1.860861 | 36.309583 | 0.69 | 82.00 | 17.24 | 687.88  | 7.39  | 6.63  | b.d. | 18.52 | -8.1  | HW |
| A14P6  | 1.734694 | 36.283478 | 0.68 | 81.40 | 17.81 | 1103.97 | 7.41  | 8.97  | b.d. | 19.51 | -6.3  | FZ |
| A14P20 | 1.723619 | 36.271606 | 0.67 | 80.63 | 18.58 | 1107.60 | 6.94  | 5.47  | b.d. | b.d.  | -7.3  | FZ |
| A14P18 | 1.724681 | 36.273306 | 0.68 | 80.81 | 18.34 | 1647.35 | 7.41  | 5.82  | b.d. | 16.39 | -6.5  | FZ |

|        |          |           |           |       |       |        |         |       |       |         |       |       |       |    |
|--------|----------|-----------|-----------|-------|-------|--------|---------|-------|-------|---------|-------|-------|-------|----|
|        | A14P7    | 1.735419  | 36.283494 | 0.65  | 77.72 | 21.51  | 1202.78 | 6.02  | 6.74  | b.d.    | b.d.  | -8.3  | FZ    |    |
|        | A14P10   | 1.730081  | 36.281619 | 0.69  | 81.60 | 17.49  | 2058.20 | 6.80  | 6.23  | b.d.    | 16.86 | -8.6  | FZ    |    |
|        | A14P21   | 1.719167  | 36.269775 | 0.85  | 80.44 | 18.56  | 1420.52 | 32.71 | 10.04 | b.d.    | 17.82 | -8.9  | FZ    |    |
|        | A14P1    | 1.727233  | 36.283283 | 0.68  | 80.96 | 18.28  | 787.91  | 6.45  | 5.72  | b.d.    | b.d.  | -9.6  | FW    |    |
|        | A14P4    | 1.731719  | 36.283842 | 0.68  | 82.13 | 17.11  | 771.18  | 5.77  | 11.76 | b.d.    | b.d.  | -9.1  | HW    |    |
| Natron | T1P1     | 2.373139  | 35.905806 | 0.67  | 81.78 | 17.47  | 773.14  | 8.26  | 5.42  | b.d.    | 0.00  | -9.3  | FZ    |    |
|        | T1P2     | 2.373083  | 35.905278 | 0.69  | 82.51 | 16.69  | 1068.13 | 7.57  | 6.23  | b.d.    | 14.40 | -7.5  | FZ    |    |
|        | T1P5     | 2.372639  | 35.904167 | 0.74  | 84.09 | 15.08  | 872.89  | 8.48  | 7.14  | b.d.    | 24.81 | -7.8  | FZ    |    |
|        | T1P12    | 2.375583  | 35.904111 | 0.73  | 83.41 | 15.78  | 779.56  | 8.27  | 9.96  | b.d.    | 20.67 | -7.9  | FZ    |    |
|        | T1P18    | 2.385     | 35.905194 | 0.73  | 83.83 | 15.34  | 988.28  | 8.04  | 5.96  | b.d.    | 0.00  | -8.8  | FZ    |    |
|        | T1P23    | 2.392278  | 35.898278 | 0.73  | 84.07 | 15.12  | 879.30  | 7.98  | 6.49  | b.d.    | 0.00  | -8.3  | FZ    |    |
|        | T3P12    | 2.679528  | 35.882139 | 0.72  | 83.73 | 15.46  | 807.21  | 7.87  | 10.21 | b.d.    | 0.00  | -7.5  | FZ    |    |
|        | T3P13    | 2.6795    | 35.882389 | 0.70  | 83.83 | 15.38  | 882.85  | 7.37  | 6.17  | b.d.    | 16.22 | -8.1  | FZ    |    |
|        | T3P14    | 2.6795    | 35.882722 | 0.72  | 81.05 | 18.13  | 961.39  | 6.20  | 6.24  | b.d.    | 18.98 | -7.9  | FZ    |    |
|        | T3P17    | 2.679833  | 35.882667 | 0.76  | 83.66 | 15.49  | 872.08  | 7.40  | 6.11  | b.d.    | 15.45 | -8.0  | FZ    |    |
|        | T3P22    | 2.680667  | 35.882889 | 0.70  | 81.08 | 18.15  | 699.21  | 6.90  | 11.90 | b.d.    | 0.00  | -7.7  | FZ    |    |
|        | T3P26    | 2.680694  | 35.884056 | 0.71  | 83.61 | 15.56  | 1183.75 | 7.05  | 5.76  | b.d.    | 0.00  | -9.9  | FZ    |    |
|        | T3P28    | 2.680657  | 35.884472 | 0.72  | 80.80 | 18.38  | 865.70  | 7.09  | 5.55  | b.d.    | 0.00  | -9.8  | FZ    |    |
|        | T3P34    | 2.679583  | 35.8855   | 0.61  | 83.67 | 15.66  | 683.20  | 7.73  | 6.55  | b.d.    | 0.00  | -7.7  | FZ    |    |
|        | T3P35    | 2.678889  | 35.88525  | 0.68  | 82.19 | 17.02  | 1033.39 | 7.66  | 9.76  | b.d.    | 15.90 | -10.6 | FZ    |    |
|        | T5P45    | 2.767     | 36.044861 |       |       |        |         |       |       |         |       |       | -11.7 | HW |
|        | T6P7     | 2.453806  | 36.086861 | 0.85  | 77.64 | 21.39  | 1214.85 | 5.82  | 8.35  | b.d.    | 21.70 | -6.4  | FZ    |    |
|        | T6P9     | 2.453944  | 36.087556 | 0.81  | 81.12 | 17.97  | 908.40  | 8.30  | 5.94  | b.d.    | 0.00  | -7.4  | FZ    |    |
|        | T6P3     | 2.453556  | 36.086111 | 0.82  | 81.65 | 17.44  | 922.00  | 7.89  | 5.80  | b.d.    | 0.00  | -7.7  | FZ    |    |
|        | T6P6     | 2.453778  | 36.086611 | 0.80  | 79.00 | 20.06  | 1414.51 | 7.18  | 6.25  | b.d.    | 0.00  | -7.2  | FZ    |    |
|        | T6P11    | 2.453889  | 36.088278 | 0.84  | 80.19 | 18.87  | 1034.56 | 8.78  | 7.39  | b.d.    | 16.76 | -7.8  | FZ    |    |
|        | T6P2     | 2.453     | 36.085944 | 0.86  | 83.62 | 15.43  | 879.47  | 13.15 | 11.22 | b.d.    | 19.29 | -8.6  | HW    |    |
|        | T6P13    | 2.45425   | 36.088667 | 0.83  | 79.15 | 19.93  | 872.40  | 9.54  | 9.50  | b.d.    | 0.00  | -8.7  | FZ    |    |
|        | T6P16    | 2.454972  | 36.088806 | 0.88  | 83.85 | 15.19  | 829.02  | 9.58  | 12.10 | b.d.    | 14.96 | -8.7  | FW    |    |
|        | T7P27    | 2.526639  | 36.045278 | 0.85  | 81.60 | 17.33  | 1012.82 | 9.62  | 10.44 | 1250.03 | 0.00  | -6.2  | FZ    |    |
|        | T7P31    | 2.5265    | 36.046583 | 0.88  | 82.90 | 16.14  | 795.65  | 9.74  | 6.41  | b.d.    | 15.62 | -6.4  | FZ    |    |
|        | T7P29    | 2.526083  | 36.046111 | 0.88  | 83.97 | 15.06  | 808.82  | 9.74  | 6.33  | b.d.    | 22.35 | -6.5  | FZ    |    |
|        | T7P24    | 2.526639  | 36.044278 | 0.81  | 82.33 | 16.76  | 957.88  | 9.78  | 10.15 | b.d.    | 0.00  | -7.7  | FZ    |    |
| T7P22  | 2.526361 | 36.043667 | 0.84      | 83.75 | 15.31 | 995.48 | 9.32    | 11.58 | b.d.  | 18.75   | -8.8  | FZ    |       |    |
| T7P23  | 2.526389 | 36.043972 | 0.87      | 83.36 | 15.68 | 888.45 | 9.57    | 9.78  | b.d.  | 0.00    | -8.7  | FZ    |       |    |
| T7P35  | 2.527333 | 36.049278 | 0.87      | 83.75 | 15.29 | 762.89 | 9.52    | 10.10 | b.d.  | 19.22   | -8.1  | FW    |       |    |

|                                       |       |          |           |      |       |       |         |       |       |      |       |       |    |
|---------------------------------------|-------|----------|-----------|------|-------|-------|---------|-------|-------|------|-------|-------|----|
|                                       | T8P42 | 2.59325  | 36.015889 | 0.90 | 81.56 | 17.44 | 925.20  | 10.26 | 6.20  | b.d. | 15.73 | -7.8  | FZ |
|                                       | T8P36 | 2.592333 | 36.014194 | 0.92 | 83.52 | 15.43 | 1224.22 | 10.44 | 6.37  | b.d. | 0.00  | -8.2  | FZ |
|                                       | T8P38 | 2.592472 | 36.014778 | 0.84 | 79.33 | 19.74 | 853.63  | 9.65  | 5.44  | b.d. | 0.00  | -8.6  | FZ |
|                                       | T8P40 | 2.592889 | 36.015333 | 0.93 | 83.36 | 15.60 | 1072.86 | 11.80 | 5.72  | b.d. | 0.00  | -9.1  | FZ |
|                                       | T9P47 | 2.610667 | 35.989583 | 0.87 | 83.67 | 15.37 | 887.28  | 10.64 | 6.16  | b.d. | 19.08 | -9.1  | HW |
|                                       | T9P49 | 2.606694 | 35.971306 | 0.83 | 82.24 | 16.86 | 669.92  | 9.44  | 5.91  | b.d. | 0.00  | -10.6 | HW |
|                                       | T9P52 | 2.618306 | 35.927556 | 0.64 | 77.08 | 22.19 | 788.17  | 6.82  | 6.94  | b.d. | 15.86 | -9.8  | HW |
|                                       | T9P53 | 2.620972 | 35.908028 | 0.69 | 83.42 | 15.78 | 1040.75 | 7.79  | 6.72  | b.d. | 16.62 | -9.7  | HW |
| Oldoinyo<br>Lengai<br>North<br>Crater | OL21  | 2.761513 | 35.91533  |      |       |       |         |       |       |      |       | -5.7  |    |
|                                       | OL23  | 2.761339 | 35.915594 | 0.83 | 83.16 | 15.14 | 8655.19 | 9.82  | 6.49  | b.d. | 21.48 | -3.0  |    |
|                                       | OL24  | 2.761322 | 35.915638 | 0.83 | 83.16 | 15.29 | 7091.05 | 9.79  | 12.26 | b.d. | 20.51 | -2.2  |    |

153 FZ: fault zone. HW: hanging wall. FW: footwall. **b.d.:** below detection limit. No gas chemistry  
154 data for T5P45 and OL21.



155 Table S2. Diffuse CO<sub>2</sub> flux data (in g m<sup>-2</sup> d<sup>-1</sup>) for different structural zones in the Magadi and  
 156 Natron basin study areas.

|                   | Magadi basin |              |          | Natron basin |              |          |
|-------------------|--------------|--------------|----------|--------------|--------------|----------|
|                   | fault zone   | hanging wall | footwall | fault zone   | hanging wall | footwall |
| number of data    | 174          | 186          | 93       | 71           | 24           | 17       |
| mean flux         | 36.6         | 8.8          | 1.9      | 17.2         | 11.7         | 1.1      |
| error (95% conf.) | 11           | 2.6          | 1.4      | 5            | 6.8          | 0.8      |

157

158 Table S3: Summary of diffuse CO<sub>2</sub> flux for the Magadi-Natron basin, including mean and total  
 159 flux from different structural zones, and estimated annual flux from each study area.

| study area | structural zone | mean flux<br>(g m <sup>-2</sup> d <sup>-1</sup> ) | area<br>(km <sup>2</sup> ) | total flux<br>(g d <sup>-1</sup> ) | annual flux<br>(Mt yr <sup>-1</sup> ) |
|------------|-----------------|---------------------------------------------------|----------------------------|------------------------------------|---------------------------------------|
| Magadi     | fault zones     | 36.6 ± 11.0                                       | 72.9                       | 2.7 x 10 <sup>9</sup>              | 0.98 ± 0.29                           |
|            | hanging walls   | 8.8 ± 2.6                                         | 150.7                      | 1.3 x 10 <sup>9</sup>              | 0.48 ± 0.14                           |
|            | footwalls       | 1.9 ± 1.4                                         | 183.8                      | 3.5 x 10 <sup>8</sup>              | 0.13 ± 0.10                           |
|            | total           |                                                   | 407.5                      |                                    | 1.59 ± 0.53                           |
| Natron     | fault zones     | 17.2 ± 5.0                                        | 33.1                       | 5.7 x 10 <sup>8</sup>              | 0.21 ± 0.06                           |
|            | hanging walls   | 11.7 ± 6.8                                        | 526.5                      | 6.2 x 10 <sup>9</sup>              | 2.25 ± 1.31                           |
|            | footwalls       | 1.1 ± 0.8                                         | 14.4                       | 1.6 x 10 <sup>7</sup>              | < 0.01                                |
|            | total           |                                                   | 574                        |                                    | 2.46 ± 1.37                           |

160 Mean and annual flux values are within 95% confidence

161

162 Table S4: Locations, temperatures, and pH of springs in the Magadi-Natron basin.

|        | ID       | latitude (S°) | longitude (E°) | Temperature (°C) | pH   |
|--------|----------|---------------|----------------|------------------|------|
| Magadi | KN14-S01 | 1.85744       | 36.21900       | 48.4             | 8.9  |
|        | KN14-S02 | 1.86319       | 36.21983       | 47.7             | 9.3  |
|        | KN14-S03 | 1.83581       | 36.21839       | 46.4             | 9.1  |
|        | KN14-S04 | 1.84329       | 36.21583       | 34.1             | -    |
|        | KN14-S05 | 2.00228       | 36.23148       | 44.7             | 9.8  |
|        | KN14-S06 | 1.99825       | 36.23131       | 44.6             | 9.9  |
|        | KN14-S07 | 2.00284       | 36.22848       | 39               | 9.8  |
|        | KN14-S08 | 1.72756       | 36.28086       | 83.5             | 9.5  |
|        | KN14-S09 | 1.72547       | 36.27828       | 82.3             | 9.3  |
|        | KN14-S10 | 1.72461       | 36.27308       | -                | -    |
|        | KN14-S11 | 1.85989       | 36.30636       | 35               | 10   |
| Natron | TZ14-S01 | 2.37314       | 35.90581       | 50.7             | 10.3 |
|        | TZ14-S02 | 2.39228       | 35.89828       | 51.2             | 10.3 |
|        | TZ14-S03 | 2.45581       | 36.08842       | 43.1             | 9.5  |
|        | TZ14-S04 | 2.52733       | 36.04928       | -                | -    |
|        | TZ14-S05 | 2.52733       | 36.04928       | 38.1             | 9.3  |
|        | TZ14-S06 | 2.59283       | 36.01597       | 36.8             | 9.2  |

163

164 **Supplementary References**

- 165 1. Burton, M. R., Sawyer, G. M. & Granieri, D. Deep carbon emission from volcanoes. *Rev.*  
166 *Mineral. Geochem.* **75**, 323-354 (2013).
- 167 2. Chiodini, G., Cardellini, C., Amato, A., Boschi, E., Caliro, S., Frondini, F. & Ventura, G.  
168 Carbon dioxide Earth degassing and seismogenesis in central and southern Italy. *Geophys.*  
169 *Res. Lett.* **31** (2004).
- 170 3. Jolie, E., Klinkmueller, M. & Moeck, I. Diffuse surface emanations as indicator of  
171 structural permeability in fault-controlled geothermal systems. *J. Volcanol. Geotherm. Res.*  
172 **290**, 97-113 (2015).
- 173 4. Crossley, R. The Cenozoic stratigraphy and structure of the western part of the Rift Valley  
174 in southern Kenya. *J. Geol. Soc. London* **139**, 393-405 (1979).
- 175 5. Angelier, J. Bergerat, F., Dauteuil, O. & Villetin, T. Effective tension-shear relationships  
176 in extensional fissure swarms, axial rift zone of northeastern Iceland. *J. Struct. Geol.* **19**,  
177 673–685 (1997).
- 178 6. Grant, J. V. & Kattenhorn, S. A. Evolution of vertical faults at an extensional plate  
179 boundary, southwest Iceland. *J. Struct. Geol.* **26**, 537–57 (2004).
- 180 7. Cowie, P. A., Scholz, C., Edwards, M. & Malinverno, A. Fault strain and seismic coupling  
181 on mid-ocean ridges. *J. Geophys. Res.* **98**, 17911-17920 (1993).
- 182 8. Chiodini, G. *et al.* Carbon isotopic composition of soil CO<sub>2</sub> efflux, a powerful method to  
183 discriminate different sources feeding soil CO<sub>2</sub> degassing in volcanic hydrothermal areas.  
184 *Earth Planet. Sci. Lett.* **274**, 372–379 (2008).

- 185 9. Werner, C. & Cardellini, C. Comparison of carbon dioxide emissions with fluid upflow,  
186 chemistry, and geologic structures at the Rotorua geothermal system, New Zealand.  
187 *Geothermics* **35**, 221–238 (2006).
- 188 10. Deutsch, C. V. & Journel, A. G. *GSLIB: Geostatistical software library and users guide*  
189 (Oxford Univ. Press, New York, 1998).
- 190 11. Foster, A., Ebinger, C., Mbede, E. & Rex, D. Tectonic development of the northern  
191 Tanzanian sector of the east African rift system. *J. Geol. Soc.* **154**, 689–700 (1997).
- 192 12. Morner, N. A. & Etiope, G. Carbon degassing from the lithosphere. *Glob. Planet. Change*,  
193 **33**. 185–203 (2002).
- 194 13. Ebinger, C. J. & Scholz, C. A. Continental Rift Basins: The East African Perspective. in  
195 *Tectonics of sedimentary basins: recent advances Ch. 9* (eds. Busby, C. & Azor, A.) (John  
196 Wiley & Sons, Chichester, UK, 2012).
- 197 14. Ibs-von Seht, M., Blumenstein, S., Wagner, R., Hollnack, D. & Wohlenberg, J.  
198 Seismicity, seismotectonics and crustal structure of the southern Kenya Rift – new data  
199 from the Lake Magadi area. *Geophys. J. Int.* **146**, 439–453 (2001).
- 200 15. Keir, D. *et al.* Lower crustal earthquakes near the Ethiopian rift induced by magmatic  
201 processes. *Geochem. Geophys. Geosyst.* **10**, Q0AB02 (2009).
- 202 16. Nyblade, A. A., Birt, C., Langston, C. A., Owens, T. J. & Last, R. J. Seismic experiment  
203 reveals rifting of the craton in Tanzania. *Eos* **77**, 517–521 (1996).
- 204 17. Hollnack, D. & Stangl, R. The seismicity related to the southern part of the Kenya rift. *J.*  
205 *Afr. Earth Sci.* **26**, 477–495 (1998).

- 206 18. Keir, D., Ebinger, C. J., Stuart, G. W., Daly, E. & Ayele, A. Strain accommodation by  
207 magmatism and faulting as rifting proceeds to breakup: seismicity of the northern  
208 Ethiopian rift. *J. Geophys. Res.* **111**, B05314 (2006).
- 209 19. Belachew, M. *et al.* Comparison of dike intrusions in an incipient seafloor-spreading  
210 segment of Afar, Ethiopia: seismicity perspectives. *J. Geophys. Res.* **116**, B06405 (2011).
- 211 20. Birt, C. S. *et al.* The influence of pre-existing structures on the evolution of the southern  
212 Kenya rift valley – Evidence from seismic and gravity studies. *Tectonophysics* **278**, 211–  
213 242 (1997).
- 214 21. Calais, E. *et al.* Aseismic strain accommodation by slow slip and dyking in a youthful  
215 continental rift, East Africa. *Nature* **456** (2008).
- 216 22. Keller, G. R., Mechie, J., Braile, L.W., Mooney, W. D. & Prodehl, C. Seismic structure of  
217 the uppermost mantle beneath the Kenya rift. *Tectonophysics* **236**, 201–216 (1994).
- 218 23. Keranen, K., Klempere, S. & Gloaguen, R. EAGLE Working Group, Three dimensional  
219 seismic imaging of a proto-ridge axis in the Main Ethiopian Rift, *Geology* **39**, 949–952  
220 (2004).
- 221 24. Lindenfeld, M., Rumpker, G., Link, K., Koehn, D. & Batte, A. Fluid-triggered earthquake  
222 swarms in the Rwenzori region, East African Rift - evidence for rift initiation.  
223 *Tectonophysics* **566**, 95-104 (2012).
- 224 25. Reyners, M., Eberhart-Phillips, D. & Stuart, G. The role of fluids in lower-crustal  
225 earthquakes near continental rifts. *Nature* **446**, 1075–1079 (2007).
- 226 26. Geissler, W. H. Seismic structure and location of a CO<sub>2</sub> source in the upper mantle of the  
227 western Eger (Ohře) rift, central Europe. *Tectonics* **24**, TC5001 (2005).

- 228 27. Kendall, J. -M., Stuart, G. W., Ebinger, C. J., Bastow, I. D. & Keir, D. Magma-assisted  
229 rifting in Ethiopia, *Nature* **433**, 146–148 (2004).
- 230 28. Whaler, K. & Hautot, S. The electrical resistivity structure of the crust beneath the northern  
231 Ethiopian rift. *Geol. Soc. Spec. Publ.* **256**, 294–305 (2006).
- 232 29. Keir, D. *et al.* Mapping the evolving strain field during continental breakup from crustal  
233 anisotropy in the Afar Depression. *Nature Communications* **2**, 285 (2011).
- 234 30. Biggs, J., Amelung, F., Gourmelen, N., Dixon, T. H. & Kim, S. W. InSAR observations  
235 of 2007 Tanzania rifting episode reveal mixed fault and dyke extension in an immature  
236 continental rift. *Geophys. J. Int.* **179**, 549–558 (2009).
- 237 31. Kennedy, B. M. *et al.* Mantle fluids in the San Andreas fault system, California. *Science*  
238 **278**, 1278–1281 (1997).
- 239 32. Albaric, J., Déverchère, J., Perrot, J., Jakovlev, A. & Deschamps, A. Deep crustal  
240 earthquakes in North Tanzania, East Africa: interplay between tectonic and magmatic  
241 processes in an incipient rift. *Geochem. Geophys. Geosyst.* **15**, 374–394 (2014).
- 242 33. Mulibo, G. & Nyblade, A. The 1994–1995 Manyara and Kwamtoro earthquake swarms:  
243 variation in the depth extent of seismicity in northern Tanzania. *S. Afr. J. Geol.* **112**, 387-  
244 404 (2009).
- 245 34. Sherrod, D. R., Magigita, M. M. & Kwelwa, S. Geologic map of Oldonyo Lengai  
246 (Oldoinyo Lengai) volcano and surroundings, Arusha region, *United Republic of Tanzania*.  
247 *Tech. Rep. 2013-1306, U.S. Geol. Surv.* pp. 65 (2013).
- 248 35. Marty, B. & Tolstikhin, I. N. CO<sub>2</sub> fluxes from mid-ocean ridges, arcs and plumes. *Chem.*  
249 *Geol.* **145**, 233–248 (1998).
- 250 36. Kagoshima, T. *et al.* Sulphur geodynamic cycle. *Sci. Rep.* **5**, 8330 (2015).

251 37. Pérez, N. M. *et al.* Global CO<sub>2</sub> emission from volcanic lakes. *Geology* **39**, 235–238 (2011).

252
